# Supplementary material
Source: PubMed Central journal article supplement (PMC8105530)
Supplement: mmc1.pdf [file mmc1.pdf]

## **Supplementary appendix**

1. Search strategy.
2. Table 1. Demographics of included patients (All data are presented as severe/non-severe groups format).
3. Table 2. Laboratory parameters in the included studies (mean value comparisons between severe and non-severe groups).
4. Table 3. Biomarkers of inflammation and end-organ damage in the included studies (mean value comparisons between severe and non-severe groups).
5. Table 4. Clinical outcomes in included studies (percentage comparisons between severe and non-severe groups).
6. Table 5. Meta-analyses comparing Chinese to non-Chinese studies (data presented as severe / non-survivor vs. non-severe / survivor)

## 1. Search strategy

((((((((((("covid 19"[All Fields] OR "covid 2019"[All Fields]) OR "severe acute respiratory syndrome coronavirus 2"[Supplementary Concept]) OR "severe acute respiratory syndrome coronavirus 2"[All Fields]) OR "2019 ncov"[All Fields]) OR "sars cov 2"[All Fields]) OR "2019ncov"[All Fields]) OR (("wuhan"[All Fields] AND ("coronavirus"[MeSH Terms] OR "coronavirus"[All Fields])) AND (2019/12/1:2019/12/31[Date - Publication] OR 2020/1/1:2020/12/31[Date - Publication]))) OR (("severe acute respiratory syndrome coronavirus 2"[Supplementary Concept] OR "severe acute respiratory syndrome coronavirus 2"[All Fields]) OR "sars cov 2"[All Fields])) OR (("severe acute respiratory syndrome coronavirus 2"[Supplementary Concept] OR "severe acute respiratory syndrome coronavirus 2"[All Fields]) OR "wuhan coronavirus"[All Fields])) OR (((("coronavirus"[MeSH Terms] OR "coronavirus"[All Fields]) OR "coronaviruses"[All Fields]) AND "2019"[All Fields])) OR ("2019"[All Fields] AND "n-CoV"[All Fields])) AND (((("laboratorial"[All Fields] OR "laboratories"[MeSH Terms]) OR "laboratories"[All Fields]) OR "laboratory"[All Fields]) OR "laboratory s"[All Fields]) OR (((("demographical"[All Fields] OR "demographically"[All Fields]) OR "demography"[MeSH Terms]) OR "demography"[All Fields]) OR "demographic"[All Fields]) OR "demographics"[All Fields]))) AND (((((((((((((((((((("thrombose"[All Fields] OR "thrombosing"[All Fields]) OR "thrombosis"[MeSH Terms]) OR "thrombosis"[All Fields]) OR "thrombosed"[All Fields]) OR "thromboses"[All Fields]) OR (((((((((((((((("blood coagulation"[MeSH Terms] OR ("blood"[All Fields] AND "coagulation"[All Fields])) OR "blood coagulation"[All Fields]) OR "coagulation"[All Fields]) OR "blood coagulation tests"[MeSH Terms]) OR (("blood"[All Fields] AND "coagulation"[All Fields]) AND "tests"[All Fields])) OR "blood coagulation tests"[All Fields]) OR "coagulability"[All Fields]) OR

"coagulable"[All Fields]) OR "coagulants"[Pharmacological Action]) OR "coagulants"[MeSH Terms]) OR "coagulants"[All Fields]) OR "coagulant"[All Fields]) OR "coagulate"[All Fields]) OR "coagulated"[All Fields]) OR "coagulates"[All Fields]) OR "coagulating"[All Fields]) OR "coagulational"[All Fields]) OR "coagulations"[All Fields]) OR "coagulative"[All Fields]) OR "coagulator"[All Fields]) OR "coagulators"[All Fields])) OR (((("inflammation"[MeSH Terms] OR "inflammation"[All Fields]) OR "inflammations"[All Fields]) OR "inflammation s"[All Fields])) OR "clot"[All Fields]) OR (("fibrin fragment d"[Supplementary Concept] OR "fibrin fragment d"[All Fields]) OR "d dimer"[All Fields])) OR (("prothrombin time"[MeSH Terms] OR ("prothrombin"[All Fields] AND "time"[All Fields])) OR "prothrombin time"[All Fields])) OR "PT"[All Fields]) OR (((("partial thromboplastin time"[MeSH Terms] OR ("partial"[All Fields] AND "thromboplastin"[All Fields]) AND "time"[All Fields])) OR "partial thromboplastin time"[All Fields]) OR (((("activated"[All Fields] AND "partial"[All Fields]) AND "thromboplastin"[All Fields]) AND "time"[All Fields])) OR "activated partial thromboplastin time"[All Fields])) OR "aPTT"[All Fields]) OR (((("fibrinogen"[MeSH Terms] OR "fibrinogen"[All Fields]) OR "fibrinogens"[All Fields]) OR "fibrinogen s"[All Fields]) OR "fibrinogene"[All Fields])) OR (("formycin diphosphate"[Supplementary Concept] OR "formycin diphosphate"[All Fields]) OR "fdp"[All Fields])) OR (((("fibrin fibrinogen degradation products"[MeSH Terms] OR (((("fibrin"[All Fields] AND "fibrinogen"[All Fields]) AND "degradation"[All Fields]) AND "products"[All Fields])) OR "fibrin fibrinogen degradation products"[All Fields]) OR ((("fibrin"[All Fields] AND "degradation"[All Fields]) AND "products"[All Fields])) OR "fibrin degradation products"[All Fields])) OR (((("l-lactate dehydrogenase"[MeSH Terms] OR ("l lactate"[All Fields] AND "dehydrogenase"[All Fields])) OR "l lactate dehydrogenase"[All Fields]) OR ((("lactic"[All Fields] AND "acid"[All Fields])

AND "dehydrogenase"[All Fields])) OR "lactic acid dehydrogenase"[All Fields])) OR "LDH"[All Fields]) OR (("interleukin-6"[MeSH Terms] OR "interleukin 6"[All Fields]) OR "interleukin 6"[All Fields])) OR (("interleukin-6"[MeSH Terms] OR "interleukin 6"[All Fields]) OR "il 6"[All Fields])) OR (("interleukin-6"[MeSH Terms] OR "interleukin 6"[All Fields]) OR "il 6"[All Fields])) OR (((("ferritin s"[All Fields] OR "ferritine"[All Fields]) OR "ferritins"[MeSH Terms]) OR "ferritins"[All Fields]) OR "ferritin"[All Fields])) OR ("curr res psychol"[Journal] OR "crp"[All Fields])) OR (((("c-reactive protein"[MeSH Terms] OR ("c reactive"[All Fields] AND "protein"[All Fields])) OR "c reactive protein"[All Fields]) OR "c reactive protein"[All Fields])) OR ("high"[All Fields] AND (((((((("hypersensitivity"[MeSH Terms] OR "hypersensitivity"[All Fields]) OR "sensitive"[All Fields]) OR "sensitively"[All Fields]) OR "sensitives"[All Fields]) OR "sensitivities"[All Fields]) OR "sensitivity and specificity"[MeSH Terms]) OR ("sensitivity"[All Fields] AND "specificity"[All Fields])) OR "sensitivity and specificity"[All Fields]) OR "sensitivity"[All Fields]) AND (((("c-reactive protein"[MeSH Terms] OR ("c reactive"[All Fields] AND "protein"[All Fields])) OR "c reactive protein"[All Fields]) OR "c reactive protein"[All Fields])))) OR "hsCRP"[All Fields])

**1 Translations**

**2 COVID-19:** "COVID-19"[All Fields] OR "COVID-2019"[All Fields] OR "severe acute respiratory syndrome coronavirus 2"[Supplementary Concept] OR "severe acute respiratory syndrome coronavirus 2"[All Fields] OR "2019-nCoV"[All Fields] OR "SARS-CoV-2"[All Fields] OR "2019nCoV"[All Fields] OR ("Wuhan"[All Fields] AND ("coronavirus"[MeSH Terms] OR "coronavirus"[All Fields])) AND (2019/12[PDAT] OR 2020[PDAT]))

- 3 **SARS-CoV-2:** "severe acute respiratory syndrome coronavirus 2"[Supplementary Concept] OR "severe acute respiratory syndrome coronavirus 2"[All Fields] OR "sars cov 2"[All Fields]
- 4 **Wuhan coronavirus:** "severe acute respiratory syndrome coronavirus 2"[Supplementary Concept] OR "severe acute respiratory syndrome coronavirus 2"[All Fields] OR "wuhan coronavirus"[All Fields]
- 5 **Coronavirus:** "coronavirus"[MeSH Terms] OR "coronavirus"[All Fields] OR "coronaviruses"[All Fields]
- 6 **laboratory:** "laboratorial"[All Fields] OR "laboratories"[MeSH Terms] OR "laboratories"[All Fields] OR "laboratory"[All Fields] OR "laboratory's"[All Fields]
- 7 **demographics:** "demographical"[All Fields] OR "demographically"[All Fields] OR "demography"[MeSH Terms] OR "demography"[All Fields] OR "demographic"[All Fields] OR "demographics"[All Fields]
- 8 **thrombosis:** "thrombose"[All Fields] OR "thrombosing"[All Fields] OR "thrombosis"[MeSH Terms] OR "thrombosis"[All Fields] OR "thrombosed"[All Fields] OR "thromboses"[All Fields]
- 9 **coagulation:** "blood coagulation"[MeSH Terms] OR ("blood"[All Fields] AND "coagulation"[All Fields]) OR "blood coagulation"[All Fields] OR "coagulation"[All Fields] OR "blood coagulation tests"[MeSH Terms] OR ("blood"[All Fields] AND "coagulation"[All Fields] AND "tests"[All Fields]) OR "blood coagulation tests"[All Fields] OR "coagulability"[All Fields] OR "coagulable"[All Fields] OR "coagulants"[Pharmacological Action] OR "coagulants"[MeSH Terms] OR "coagulants"[All Fields] OR "coagulant"[All Fields] OR "coagulate"[All Fields] OR "coagulated"[All Fields] OR "coagulates"[All Fields]

OR "coagulating"[All Fields] OR "coagulation"[All Fields] OR "coagulations"[All Fields]  
OR "coagulative"[All Fields] OR "coagulator"[All Fields] OR "coagulators"[All Fields]

- 10 **inflammation:** "inflammation"[MeSH Terms] OR "inflammation"[All Fields] OR  
"inflammations"[All Fields] OR "inflammation's"[All Fields]
- 11 **d-dimer:** "fibrin fragment D"[Supplementary Concept] OR "fibrin fragment D"[All Fields]  
OR "d dimer"[All Fields]
- 12 **Prothrombin time:** "prothrombin time"[MeSH Terms] OR ("prothrombin"[All Fields] AND  
"time"[All Fields]) OR "prothrombin time"[All Fields]
- 13 **activated Partial thromboplastin time:** "partial thromboplastin time"[MeSH Terms] OR  
("partial"[All Fields] AND "thromboplastin"[All Fields] AND "time"[All Fields]) OR  
"partial thromboplastin time"[All Fields] OR ("activated"[All Fields] AND "partial"[All  
Fields] AND "thromboplastin"[All Fields] AND "time"[All Fields]) OR "activated partial  
thromboplastin time"[All Fields]
- 14 **Fibrinogen:** "fibrinogen"[MeSH Terms] OR "fibrinogen"[All Fields] OR "fibrinogens"[All  
Fields] OR "fibrinogen's"[All Fields] OR "fibrinogene"[All Fields]
- 15 **FDP:** "formycin diphosphate"[Supplementary Concept] OR "formycin diphosphate"[All  
Fields] OR "fdp"[All Fields]
- 16 **Fibrin degradation products:** "fibrin fibrinogen degradation products"[MeSH Terms] OR  
("fibrin"[All Fields] AND "fibrinogen"[All Fields] AND "degradation"[All Fields] AND  
"products"[All Fields]) OR "fibrin fibrinogen degradation products"[All Fields] OR  
("fibrin"[All Fields] AND "degradation"[All Fields] AND "products"[All Fields]) OR "fibrin  
degradation products"[All Fields]

- 17 **Lactic acid dehydrogenase:** "l-lactate dehydrogenase"[MeSH Terms] OR ("l-lactate"[All Fields] AND "dehydrogenase"[All Fields]) OR "l-lactate dehydrogenase"[All Fields] OR ("lactic"[All Fields] AND "acid"[All Fields] AND "dehydrogenase"[All Fields]) OR "lactic acid dehydrogenase"[All Fields]
- 18 **Interleukin-6:** "interleukin-6"[MeSH Terms] OR "interleukin-6"[All Fields] OR "interleukin 6"[All Fields]
- 19 **IL 6:** "interleukin-6"[MeSH Terms] OR "interleukin-6"[All Fields] OR "il 6"[All Fields]
- 20 **IL-6:** "interleukin-6"[MeSH Terms] OR "interleukin-6"[All Fields] OR "il 6"[All Fields]
- 21 **Ferritin:** "ferritin's"[All Fields] OR "ferritine"[All Fields] OR "ferritins"[MeSH Terms] OR "ferritins"[All Fields] OR "ferritin"[All Fields]
- 22 **CRP:** "Curr Res Psychol"[Journal: \_\_jid101697883] OR "crp"[All Fields]
- 23 **C-reactive protein:** "c-reactive protein"[MeSH Terms] OR ("c-reactive"[All Fields] AND "protein"[All Fields]) OR "c-reactive protein"[All Fields] OR "c reactive protein"[All Fields]
- 24 **sensitivity:** "hypersensitivity"[MeSH Terms] OR "hypersensitivity"[All Fields] OR "sensitive"[All Fields] OR "sensitively"[All Fields] OR "sensitives"[All Fields] OR "sensitivities"[All Fields] OR "sensitivity and specificity"[MeSH Terms] OR ("sensitivity"[All Fields] AND "specificity"[All Fields]) OR "sensitivity and specificity"[All Fields] OR "sensitivity"[All Fields]
- 25 **C reactive protein:** "c-reactive protein"[MeSH Terms] OR ("c-reactive"[All Fields] AND "protein"[All Fields]) OR "c-reactive protein"[All Fields] OR "c reactive protein"[All Fields]

2. **Table 1.** Demographics of included patients (All data are presented as severe/non-severe groups format)

| Study name                          | Total patients (n) | Age (mean, years) | Men (%)   | HTN (%)   | Diabetes (%) | Coronary or CVD (%) | CKD (%)  | Malignancy (%) | CLD (%)  | COPD (%) |
|-------------------------------------|--------------------|-------------------|-----------|-----------|--------------|---------------------|----------|----------------|----------|----------|
| Bazzan et al. <sup>1</sup>          | 9/79               | 71.9/59.4         | 66.7/68.4 | -         | -            | -                   | -        | -              | -        | -        |
| Bonetti et al. <sup>2</sup>         | 70/74              | 78/62.1           | 64.3/68.9 | -         | 30/21.6      | 54.3/44.6           | 12.9/4.1 | -              | -        | -        |
| Burian et al. <sup>3</sup>          | 28/37              | 64.9/59           | -         | -         | -            | -                   | -        | -              | -        | -        |
| Cen et al. <sup>4</sup>             | 222/720            | 68/69             | 59/68.5   | 41.9/20.1 | 24.3/7.1     | 13.1/5.8            | 2.7/0.8  | -              | -        | 11.3/1.9 |
| Chen et al. (1) <sup>5</sup>        | 24/126             | 68.5/57.1         | 75/52.4   | 58.3/27.8 | 20.8/11.9    | 25/2.4              | -        | -              | -        | -        |
| Chen et al. (2) <sup>6</sup>        | 11/10              | 61/52             | 90.9/70   | 36.4/10   | 18.2/10      | -                   | -        | -              | -        | -        |
| Chen et al. (3) <sup>7</sup>        | 17/21              | 79.6/52.8         | 88.2/61.9 | 70.6/28.6 | 41.2/19      | 52.9/19             | -        | 17.6/4.8       | 5.9/14.3 | -        |
| Deng et al. <sup>8</sup>            | 109/116            | 69/40             | 67/44     | 36.7/15.5 | 15.6/7.8     | 11.9/3.4            | -        | 5.5/1.7        | -        | -        |
| Du et al. <sup>9</sup>              | 21/158             | 70.2/56           | 47.6/55.1 | 61.9/28.5 | 28.6/17.1    | 57.1/10.8           | -        | 4.8/1.9        | -        | -        |
| Duan et al. <sup>10</sup>           | 20/328             | 58/44             | 70/51.8   | 20/7      | 10/2.7       | 0/1.5               | 0/0.3    | N/A            | 10/2.7   | -        |
| Fan et al. <sup>11</sup>            | 47/26              | 65.5/46.2         | 68.1/65.4 | 44.7/11.5 | -            | 14.9/0              | -        | -              | -        | -        |
| Fogarty et al. <sup>12</sup>        | 33/50              | 67.9/60.5         | 66.7/66   | -         | -            | -                   | -        | -              | -        | -        |
| Fu et al. <sup>13</sup>             | 16/59              | 51.8/45.1         | 62.5/59.3 | -         | -            | -                   | -        | -              | -        | -        |
| Gan et al. <sup>14</sup>            | 39/56              | 70/62             | 71.8/53.6 | 43.6/41.1 | 25.6/21.4    | 12.8/8.9            | 2.6/10.7 | 12.8/1.8       | -        | 20/0     |
| Gao et al. <sup>15</sup>            | 15/28              | 45.2/43           | 60/60.7   | 40/25     | 40/3.6       | 6.7/7.1             | -        | -              | -        | 20/0     |
| Gong et al. <sup>16</sup>           | 28/161             | 63.5/45           | 57.1/44.7 | -         | -            | -                   | -        | -              | -        | -        |
| Goshua et al. <sup>17</sup>         | 48/20              | 64/58             | 68.8/40   | 58.3/50   | 33.3/20      | -                   | 14.6/0   | 6.3/0          | -        | -        |
| Huang et al. <sup>18</sup>          | 13/28              | 49/49             | 84.6/67.9 | 15.4/14.3 | 7.7/25       | 23.1/10.7           | -        | 0/3.6          | 0/3.6    | 7.7/0    |
| Javanian et al. <sup>19</sup>       | 19/81              | 69.3/57.7         | 63.2/48.1 | 63.2/24.7 | 52.6/33.3    | 52.6/16             | 26.3/8.6 | 15.8/1.2       | 10.5/1.2 | 26.3/8.6 |
| Ji et al. <sup>20</sup>             | 9/70               | -                 | -         | -         | -            | -                   | -        | -              | -        | -        |
| Khamis et al. <sup>21</sup>         | 24/39              | 50/47             | 87.5/82.1 | 29.2/33.3 | 45.8/23.1    | -                   | -        | -              | -        | -        |
| Li et al. (1) <sup>22</sup>         | 25/58              | 53.7/41.9         | 60/34.5   | 8/5.2     | 28/0         | 4/0                 | -        | -              | -        | 16/1.7   |
| Li et al. (2) <sup>23</sup>         | 120/136            | 65/49             | 59.2/48.5 | -         | -            | 42.5/18.4           | -        | -              | -        | -        |
| Li et al. (3) <sup>24</sup>         | 25/68              | 69/43.7           | 60/38.2   | 20/0      | 20/8.8       | 16/0                | -        | 4/4.4          | -        | 8/8.8    |
| Li et al. (4) <sup>25</sup>         | 122/1327           | 69/55             | 73.8/48.5 | -         | -            | -                   | -        | -              | -        | -        |
| Li et al. (5) <sup>26</sup>         | 15/87              | 69/55             | -         | 46.7/27.6 | 13.3/14.9    | 13.3/2.3            | -        | -              | 0/3.4    | -        |
| Liu et al. (1) <sup>27</sup>        | 12/87              | -                 | -         | -         | -            | -                   | -        | -              | -        | -        |
| Liu et al. (2) <sup>28</sup>        | 11/67              | 66/37             | 63.6/47.8 | 18.2/9    | 18.2/4.5     | -                   | -        | 18.2/3         | -        | 9.1/1.5  |
| Liu et al. (3) <sup>29</sup>        | 34/302             | 74/64             | 61.8/49   | -         | -            | -                   | -        | -              | -        | -        |
| Lu et al. <sup>30</sup>             | 22/243             | -                 | -         | 45.5/17.3 | 27.3/6.2     | 22.7/4.5            | 9.1/1.2  | 4.5/2.1        | 4.5/0    | 9.1/0.8  |
| Lv et al. <sup>31</sup>             | 84/115             | -                 | 47.6/50.4 | 21.4/20   | 9.5/7.8      | 7.1/4.3             | -        | 0/1.7          | -        | 1.2/1.7  |
| Ma et al. <sup>32</sup>             | 20/64              | 58/46.5           | 60/56.3   | 20/12.5   | 35/4.7       | -                   | 0/1.6    | 0/6            | 20/10.9  | -        |
| Masetti et al. <sup>33</sup>        | 33/196             | 75.2/58.3         | 78.8/62.2 | 72.7/32.1 | 39.4/15.3    | 27.3/6.1            | 18.2/2.6 | 24.2/8.2       | -        | 15.2/5.6 |
| Mao et al. <sup>34</sup>            | 88/126             | 58.2/48.9         | 50/34.1   | 36.4/15.1 | 17/11.9      | 8/6.3               | 2.3/3.2  | 5.7/6.3        | -        | -        |
| Middeldorp et al. <sup>35</sup>     | 75/123             | 62/60             | 77.3/58.5 | -         | -            | -                   | -        | 4/3.3          | -        | -        |
| Ortiz-Brizuela et al. <sup>36</sup> | 29/111             | 53/48             | 68/58.6   | 34.5/31.5 | 41.4/18      | 3.4/4.5             | -        | -              | 3.4/0.9  | -        |
| Pan et al. <sup>37</sup>            | 89/35              | 69/65             | 75.3/51.4 | 52.8/42.9 | 21.3/17.1    | 14.6/17.1           | -        | -              | -        | -        |



|                                   |          |           |           |           |           |           |           |          |          |           |
|-----------------------------------|----------|-----------|-----------|-----------|-----------|-----------|-----------|----------|----------|-----------|
| Qian et al. <sup>38</sup>         | 9/82     | 66/49     | -         | -         | -         | -         | -         | -        | -        | -         |
| Qin et al. <sup>39</sup>          | 286/166  | 61/53     | 54.2/48.2 | 36.7/18.1 | 18.5/13.3 | 11.2/3.6  | 2.1/2.4   | 3.5/2.4  | 1/1.8    | 3.1/1.8   |
| Rastad et al. <sup>40</sup>       | 301/2656 | 67.3/53.3 | 55.5/53.5 | -         | 15.9/8.2  | 17.9/9.8  | -         | -        | -        | -         |
| Ruan et al. <sup>41</sup>         | 68/82    | 67/50     | 72.1/64.6 | 42.6/28   | 17.6/15.9 | 29.4/6.1  | 2.9/0     | 2.9/1.2  | 1.5/3.7  | 2.9/1.2   |
| Salacup et al. <sup>42</sup>      | 52/190   | 73.2/64.1 | 51.9/50.5 | 80.8/72.6 | 57.7/46.3 | -         | 21.2/16.3 | -        | -        | 13.5/12.1 |
| Satici et al. <sup>43</sup>       | 55/626   | 65.8/56.1 | 60/50.2   | 50.9/32.9 | 41.8/26.8 | 14.5/8.6  | 7.3/3.2   | -        | -        | 1.8/4.3   |
| Shahriarirad et al. <sup>44</sup> | 11/102   | -         | 63.6/62.7 | 45.5/16.7 | 27.3/12.7 | 36.4/11.8 | 0/5.9     | 0/1      | -        | 9.1/7.8   |
| Shi et al. <sup>45</sup>          | 62/609   | 74/61     | 56.5/47.1 | 59.7/26.6 | 27.4/13.1 | 46.8/8.7  | 19.4/2.6  | 6.5/3.1  | -        | 3.2/3.4   |
| Sun et al. <sup>46</sup>          | 9/8      | 63/23     | -         | 33.3/0    | 11.1/0    | 33.3/0    | -         | -        | 11.1/0   | -         |
| Tang et al. (1) <sup>47</sup>     | 21/162   | 64/52.4   | 76.2/50.6 | -         | -         | -         | -         | -        | -        | -         |
| Tang et al. (2) <sup>48</sup>     | 134/315  | 68.7/63.7 | 67.2/56.5 | -         | -         | -         | -         | -        | -        | -         |
| Tian et al. <sup>49</sup>         | 148/84   | 64/63     | 54.7/45.2 | 45.9/33.3 | 22.3/26.2 | 15.5/9.5  | 2.7/2.4   | 100/100  | -        | 1.4/1.2   |
| Vultaggio et al. <sup>50</sup>    | 63/145   | 72/63     | 73/60.7   | 58.7/42.1 | 27/15.9   | -         | 9.5/5.5   | 12.7/9   | -        | -         |
| Wan et al. <sup>51</sup>          | 40/95    | 56/44     | 52.5/54.7 | 10/9.5    | 22.5/3.2  | 15/1.1    | -         | 7.5/1.1  | 2.5/1.1  | 10/0      |
| Wang et al. (1) <sup>52</sup>     | 36/102   | 66/51     | 61.1/52   | 58.3/21.6 | 22.2/5.9  | 41.7/11.8 | 5.6/2     | 11.1/5.9 | 0/3.9    | 8.3/1     |
| Wang et al. (2) <sup>53</sup>     | 19/88    | 73/44.5   | 84.2/46.6 | 52.6/18.2 | 26.3/6.8  | 52.6/10.2 | 5.3/2.3   | -        | 5.3/5.7  | 5.3/2.3   |
| Wang et al. (3) <sup>54</sup>     | 39/46    | 65.1/53.6 | 69.2/39.1 | 41/13     | 17.9/6.5  | 20.5/2.2  | -         | -        | 10.3/4.3 | 10.3/2.2  |
| Wang et al. (4) <sup>55</sup>     | 16/193   | 54/42     | 62.5/49.2 | 31.3/11.4 | 0/5.7     | 6.3/2.1   | -         | -        | -        | -         |
| Wang et al. (5) <sup>56</sup>     | 14/14    | 71.4/65.8 | 71.4/78.6 | 71.4/35.7 | -         | 42.9/14.3 | -         | -        | -        | -         |
| Wang et al. (6) <sup>57</sup>     | 15/30    | 62/52.2   | -         | -         | -         | -         | -         | -        | -        | -         |
| Wu et al. (1) <sup>58</sup>       | 84/117   | 58.5/48   | 71.4/58.1 | 27.4/13.7 | 19/5.1    | 6/2.6     | -         | -        | -        | -         |
| Yan et al. <sup>59</sup>          | 39/9     | 70.5/64.7 | 76.9/33.3 | 53.8/33.3 | 100/100   | 41/22.2   | -         | -        | -        | -         |
| Yang et al. (1) <sup>60</sup>     | 32/20    | 64.6/51.9 | 65.6/70   | -         | 21.9/10   | 31.3/10   | -         | 3.1/5    | -        | -         |
| Yang et al. (2) <sup>61</sup>     | 33/103   | 64/53.5   | 54.5/46.6 | 51.5/18.4 | 30.3/9.7  | 21.2/2.9  | -         | 3/2.9    | 6.1/5.8  | -         |
| Yang et al. (3) <sup>62</sup>     | 24/69    | 57.9/42.1 | 75/55.1   | 66.7/10.1 | 54.2/11.6 | 37.5/5.8  | 33.3/2.9  | -        | -        | -         |
| Yang et al. (4) <sup>63</sup>     | 50/176   | 67.8/49.9 | 62/46.6   | 74/26.7   | 34/15.9   | 14/3.4    | -         | -        | -        | 6/1.7     |
| Ye et al. <sup>64</sup> $\beta$   | 52/297   | 69/60     | 69.2/46.1 | 57.7/24.6 | 30.8/13.8 | -         | -         | -        | -        | -         |
| Zeng et al. <sup>65</sup>         | 55/406   | 60/43     | 60/50.7   | 34.5/15.8 | 14.5/9.9  | 10.9/4.7  | -         | -        | -        | -         |
| Zhang et al. (1) <sup>66</sup>    | 58/82    | 64/51.5   | 56.9/46.3 | 37.9/24.4 | 13.8/11   | 6.9/3.7   | 3.4/0     | -        | -        | 3.4/0     |
| Zhang et al. (2) <sup>67</sup>    | 16/293   | -         | -         | -         | -         | -         | -         | -        | -        | -         |
| Zhang et al. (3) <sup>68</sup>    | 18/93    | 60/36     | 77.8/34.4 | 55.6/5.4  | 50/5.4    | 11.1/1.1  | -         | 0/8.6    | 5.6/0    | 5.6/2.2   |
| Zhang et al. (4) <sup>69</sup>    | 5/14     | 71/65     | 60/50     | -         | -         | -         | -         | -        | -        | -         |
| Zhang et al. (5) <sup>70</sup>    | 27/47    | 72/61     | 66.7/38.3 | 55.6/42.6 | 100/100   | 37/10.6   | -         | 7.4/10.6 | -        | -         |
| Zheng et al. <sup>71</sup>        | 30/131   | 57/40     | 46.7/50.4 | 40/7.6    | 6.7/3.8   | 10/3.8    | -         | -        | 0/3.1    | 6.7/3.1   |
| Zhou et al. (1) <sup>72</sup>     | 54/137   | 69/52     | 70.4/59.1 | 48.1/23.4 | 31.5/13.9 | 24.1/1.5  | 3.7/0     | 0/1.5    | -        | 7.4/1.5   |
| Zhou et al. (2) <sup>73</sup>     | 5/12     | 42.2/41.5 | -         | -         | -         | -         | -         | 0        | -        | -         |
| Zhu et al. (1) <sup>74</sup>      | 16/111   | 57.5/50   | 56.3/65.8 | 50/20.7   | 0/9       | 12.5/3.6  | -         | 6.3/3.6  | -        | -         |
| Zhu et al. (2) <sup>75</sup>      | 29/73    | 62.2/72.6 | 65.5/53.4 | -         | -         | -         | -         | -        | -        | -         |

PMID= PubMed ID; HTN=Hypertension; CVD=Cerebrovascular disease; CKD=Chronic Kidney disease; CLD=Chronic liver disease; COPD=Chronic obstructive pulmonary disease

3. **Table 2.** Laboratory parameters in the included studies (mean value comparisons between severe and non-severe groups)

| Study name                          | Lymphocyte count | Platelet count | D-dimer (mg/L) | PT (sec)  | aPTT (sec) | Fibrinogen (g/L) | FDP (µg/mL) |
|-------------------------------------|------------------|----------------|----------------|-----------|------------|------------------|-------------|
| Bazzan et al. <sup>1</sup>          | -                | 140/268        | 4.2/1.5        | -         | -          | -                | -           |
| Bonetti et al. <sup>2</sup>         | 0.75/1.04        | 178/189        | 2/0.9          | -         | 34/31      | -                | -           |
| Burian et al. <sup>3</sup>          | -                | -              | 2.4/1.6        | -         | -          | -                | -           |
| Cen et al. <sup>4</sup>             | 0.9/1.4          | 225/216        | 1.3/0.5        | -         | -          | -                | -           |
| Chen et al. (1) <sup>5</sup>        | -                | -              | -              | -         | -          | -                | -           |
| Chen et al. (2) <sup>6</sup>        | 0.7/1.1          | -              | 2.6/0.3        | 14.3/13.4 | 33.7/44    | -                | -           |
| Chen et al. (3) <sup>7</sup>        | 0.6/1.3          | -              | -              | -         | -          | -                | -           |
| Deng et al. <sup>8</sup>            | 0.6/1            | -              | -              | -         | -          | -                | -           |
| Du et al. <sup>9</sup>              | 0.7/0.8          | -              | 1.1/0.5        | 13.9/13.7 | 37.8/35.3  | -                | -           |
| Duan et al. <sup>10</sup>           | 1.1/1.3          | 127/196        | 0.3/0.2        | 12.1/11.5 | 37.8/33.2  | 4.6/3.9          | -           |
| Fan et al. <sup>11</sup>            | 0.6/1            | 168/204        | 1.5/0.5        | 11.8/11.1 | -          | -                | -           |
| Fogarty et al. <sup>12</sup>        | -                | 196/201        | 1/0.8          | 12.9/12.6 | 30.4/31.3  | 5.6/4.5          | -           |
| Fu et al. <sup>13</sup>             | 1/1.4            | -              | 0.3/0.2        | -         | -          | 1.6/0.9          | -           |
| Gan et al. <sup>14</sup>            | 0.7/1.2          | 200/232        | 5.8/2.8        | 16.1/13.9 | -          | -                | -           |
| Gao et al. <sup>15</sup>            | 1.2/1.1          | -              | 0.5/0.2        | -         | -          | 3.8/3.1          | -           |
| Gong et al. <sup>16</sup>           | 1/1.3            | 167/180        | 1.2/1          | -         | 40/39.1    | -                | -           |
| Goshua et al. <sup>17</sup>         | -                | -              | 4.2/0.7        | -         | -          | -                | -           |
| Huang et al. <sup>18</sup>          | 0.4/1            | 196/149        | 2.4/0.5        | 12.2/10.7 | 26.2/27.7  | -                | -           |
| Javanian et al. <sup>19</sup>       | 1.5/2.6          | 210/184        | -              | -         | -          | -                | -           |
| Ji et al. <sup>20</sup>             | 0.6/1.2          | 166/161        | 1.7/0.4        | 12.1/11.2 | -          | -                | -           |
| Khamis et al. <sup>21</sup>         | -                | 253/215        | 2.3/0.4        | -         | -          | -                | -           |
| Li et al. (1) <sup>22</sup>         | 0.7/1.2          | -              | -              | -         | -          | -                | -           |
| Li et al. (2) <sup>23</sup>         | 0.8/1.2          | -              | 0.6/0.2        | -         | -          | -                | -           |
| Li et al. (3) <sup>24</sup>         | 0.8/1.2          | 136/181        | 0.6/0.3        | 13.7/13   | 44.6/38.3  | -                | -           |
| Li et al. (4) <sup>25</sup>         | -                | 166/208        | 3.6/0.4        | 14/13     | 35/34      | 4.3/3.6          | -           |
| Li et al. (5) <sup>26</sup>         | 0.5/0.9          | 113/207        | 2.1/0.7        | 14.9/14.1 | -          | -                | -           |
| Liu et al. (1) <sup>27</sup>        | 0.6/1.1          | 187/194        | 4.1/0.8        | 13.3/13   | 29.3/30.4  | 4.3/4.3          | -           |
| Liu et al. (2) <sup>28</sup>        | 0.5/1            | 144/173        | 0.6/0.4        | -         | -          | -                | -           |
| Liu et al. (3) <sup>29</sup>        | 0.4/1.4          | -              | 4.0/0.4        | 14.8/13.3 | -          | 5.3/3.8          | -           |
| Lu et al. <sup>30</sup>             | 0.7/1.2          | 156/177        | 0.8/0.4        | 13.5/13.3 | 41.9/39.3  | -                | 1.9/0.9     |
| Lv et al. <sup>31</sup>             | 0.9/1.3          | -              | 12/1.9         | -         | -          | -                | -           |
| Ma et al. <sup>32</sup>             | 0.8/1.4          | 213/213        | 0.6/0.4        | 13.1/12.7 | -          | -                | -           |
| Masetti et al. <sup>33</sup>        | 0.8/1.1          | 159/218        | 3.9/0.5        | -         | -          | 5.4/5.5          | -           |
| Mao et al. <sup>34</sup>            | 0.9/1.3          | 205/219        | 0.9/0.4        | -         | -          | -                | -           |
| Middeldorp et al. <sup>35</sup>     | -                | 251/331        | 2/1.1          | -         | -          | -                | -           |
| Ortiz-Brizuela et al. <sup>36</sup> | 0.7/0.9          | 213/193        | 7.3/4.5        | -         | -          | 6.8/4.9          | -           |
| Pan et al. <sup>37</sup>            | 0.6/0.9          | 182/197        | 4/1.1          | 14.2/13.7 | 37.4/38.5  | 4.6/4.7          | -           |
| Qian et al. <sup>38</sup>           | 0.9/1.4          | -              | 4.5/3          | -         | -          | 3.8/3.4          | -           |
| Qin et al. <sup>39</sup>            | 0.8/1            | -              | -              | -         | -          | -                | -           |

|                                   |         |         |          |           |           |         |           |
|-----------------------------------|---------|---------|----------|-----------|-----------|---------|-----------|
| Rastad et al. <sup>40</sup>       | 1.1/2.5 | -       | -        | -         | -         | -       | -         |
| Ruan et al. <sup>41</sup>         | 0.6/1.4 | 174/222 | -        | -         | -         | -       | -         |
| Salacup et al. <sup>42</sup>      | -       | -       | 2.2/1.5  | -         | -         | -       | -         |
| Satici et al. <sup>43</sup>       | 0.9/1.3 | 199/195 | 1.5/0.9  | -         | -         | 4/3.5   | -         |
| Shahriarirad et al. <sup>44</sup> | 1.4/1.1 | 220/221 | -        | 16.3/15.3 | 37.8/37.6 | -       | -         |
| Shi et al. <sup>45</sup>          | -       | 153/215 | -        | -         | -         | -       | -         |
| Sun et al. <sup>46</sup>          | 0.8/2   | 194/204 | 2/0.2    | 21.3/12   | -         | 3.6/2   | -         |
| Tang et al. (1) <sup>47</sup>     | -       | -       | 2.1/0.6  | 15.5/13.6 | 44.8/41.2 | 5.2/4.5 | 7.6/4     |
| Tang et al. (2) <sup>48</sup>     | -       | -       | 4.7/1.5  | 16.5/14.6 | -         | -       | -         |
| Tian et al. <sup>49</sup>         | 0.7/1   | 174/201 | 1.9/0.7  | 13.9/13.2 | 37.7/33.2 | -       | -         |
| Vultaggio et al. <sup>50</sup>    | -       | -       | -        | -         | -         | -       | -         |
| Wan et al. <sup>51</sup>          | 0.8/1.2 | 147/170 | 0.6/0.3  | 11.3/10.8 | 29.7/26.6 | -       | -         |
| Wang et al. (1) <sup>52</sup>     | 0.8/0.9 | 142/165 | 4.1/1.7  | 13.2/12.9 | 30.4/31.7 | -       | -         |
| Wang et al. (2) <sup>53</sup>     | 0.8/0.9 | 122/178 | 0.4/0.2  | 12.6/12.9 | 32.7/31.7 | -       | -         |
| Wang et al. (3) <sup>54</sup>     | 0.7/1   | 175/157 | 0.4/0.2  | 13.2/12.7 | 29.5/30.6 | -       | -         |
| Wang et al. (4) <sup>55</sup>     | 1/1.2   | -       | -        | -         | -         | -       | -         |
| Wang et al. (5) <sup>56</sup>     | 0.5/0.8 | 175/187 | 11.3/0.8 | 14.5/14.1 | 39/40.7   | -       | -         |
| Wang et al. (6) <sup>57</sup>     | 0.5/0.9 | -       | 6.9/1.6  | -         | -         | -       | -         |
| Wu et al. (1) <sup>58</sup>       | 0.7/1.1 | 187/178 | 1.2/0.5  | 11.7/10.6 | 26/29.8   | -       | -         |
| Yan et al. <sup>59</sup>          | 0.5/0.9 | 160/161 | 5/0.4    | 15.2/13.6 | 39/36.3   | 5.1/4.8 | -         |
| Yang et al. (1) <sup>60</sup>     | 0.6/0.7 | 191/164 | -        | 12.9/10.9 | -         | -       | -         |
| Yang et al. (2) <sup>61</sup>     | 0.8/0.9 | 147/176 | 0.9/0.5  | 12.1/11.6 | 33.7/30.7 | -       | -         |
| Yang et al. (3) <sup>62</sup>     | 0.7/1.2 | -       | 16.6/0.5 | -         | -         | 3.2/3.8 | -         |
| Yang et al. (4) <sup>63</sup>     | 0.7/1.1 | -       | 6.2/0.6  | -         | -         | -       | -         |
| Ye et al. <sup>64</sup> $\beta$   | -       | -       | 1.8/0.4  | 14.3/12.8 | 34.6/34.9 | 3.9/3.8 | -         |
| Zeng et al. <sup>65</sup>         | 0.7/1.2 | 151/199 | 0.5/0.3  | 12.6/11.9 | 33.5/32.5 | -       | -         |
| Zhang et al. (1) <sup>66</sup>    | 0.7/0.8 | -       | 0.4/0.2  | -         | -         | -       | -         |
| Zhang et al. (2) <sup>67</sup>    | 0.6/1.2 | 156/182 | 0.8/0.4  | -         | -         | -       | -         |
| Zhang et al. (3) <sup>68</sup>    | 0.6/1.3 | 146/190 | -        | -         | -         | -       | -         |
| Zhang et al. (4) <sup>69</sup>    | -       | 88/214  | 3.6/2.7  | 17.7/15.2 | 71.9/46.8 | 3.6/4.8 | 20.7/11.8 |
| Zhang et al. (5) <sup>70</sup>    | 0.7/1.4 | 172/318 | 8.3/2.4  | -         | -         | -       | -         |
| Zheng et al. <sup>71</sup>        | 0.9/1.1 | 160/171 | -        | -         | -         | -       | -         |
| Zhou et al. (1) <sup>72</sup>     | 0.6/1.1 | 166/220 | 5.2/0.6  | 12.1/11.4 | -         | -       | -         |
| Zhou et al. (2) <sup>73</sup>     | 0.7/1.2 | -       | 0.3/0.3  | -         | -         | -       | -         |
| Zhu et al. (1) <sup>74</sup>      | 0.7/1.2 | 155/205 | 0.2/0.1  | -         | -         | 5.7/4.2 | -         |
| Zhu et al. (2) <sup>75</sup>      | 0.6/0.7 | 113/153 | 0.5/0.2  | 12.4/11.6 | 40.7/40.2 | 4.2/5.1 | -         |

4. **Table 3.** Biomarkers of inflammation and end-organ damage in the included studies (mean value comparisons between severe and non-severe groups)

| Study name                          | CRP (mg/L) | hs-CRP (mg/L) | IL-6 (pg/L) | Ferritin (ng/mL) | hs Tn I (pg/mL) | LDH, U/L |
|-------------------------------------|------------|---------------|-------------|------------------|-----------------|----------|
| Bazzan et al. <sup>1</sup>          | -          | -             | -           | -                | -               | -        |
| Bonetti et al. <sup>2</sup>         | 165.7/60.3 | -             | -           | 1285/702         | 47.5/8          | 521/316  |
| Burian et al. <sup>3</sup>          | 12.4/4.8   | -             | 103.9/51.7  | -                | -               | -        |
| Cen et al. <sup>4</sup>             | 25.5/44.9  | -             | -           | -                | -               | 262/290  |
| Chen et al. (1) <sup>5</sup>        | -          | 84.9/30.9     | -           | -                | 68.5/4.5        | -        |
| Chen et al. (2) <sup>6</sup>        | -          | -             | 41.5/15.3   | 1598/337         | -               | -        |
| Chen et al. (3) <sup>7</sup>        | -          | -             | 64/10.4     | -                | -               | -        |
| Deng et al. <sup>8</sup>            | 109.3/3.2  | -             | -           | -                | -               | -        |
| Du et al. <sup>9</sup>              | 86.4/36    | -             | -           | -                | -               | -        |
| Duan et al. <sup>10</sup>           | 47/7       | -             | -           | -                | -               | -        |
| Fan et al. <sup>11</sup>            | 118.2/52.1 | -             | 9.1/4.9     | -                | -               | 449/281  |
| Fogarty et al. <sup>12</sup>        | 94.8/37.9  | -             | -           | -                | -               | -        |
| Fu et al. <sup>13</sup>             | 39/11.3    | -             | -           | -                | -               | -        |
| Gan et al. <sup>14</sup>            | 123.2/43.5 | -             | 139.1/31.9  | -                | -               | 503/305  |
| Gao et al. <sup>15</sup>            | 39.4/18.8  | -             | 36.1/10.6   | -                | -               | -        |
| Gong et al. <sup>16</sup>           | 35.5/5     | -             | -           | -                | -               | 296/176  |
| Goshua et al. <sup>17</sup>         | -          | -             | -           | -                | -               | -        |
| Huang et al. <sup>18</sup>          | -          | -             | -           | -                | 3.3/3.5         | 400/281  |
| Javanian et al. <sup>19</sup>       | 92/47.2    | -             | -           | -                | -               | -        |
| Ji et al. <sup>20</sup>             | 91.6/12.6  | -             | -           | -                | -               | -        |
| Khamis et al. <sup>21</sup>         | 148/37     | -             | -           | 965/632          | -               | 444/293  |
| Li et al. (1) <sup>22</sup>         | 89.2/9.6   | -             | -           | -                | -               | -        |
| Li et al. (2) <sup>23</sup>         | -          | -             | -           | -                | -               | -        |
| Li et al. (3) <sup>24</sup>         | 77/7.7     | -             | -           | 810/489          | 13.2/7          | -        |
| Li et al. (4) <sup>25</sup>         | 93/9       | -             | 71/9        | 1584/446         | -               | 470/199  |
| Li et al. (5) <sup>26</sup>         | -          | 78.7/25.4     | 48.4/4.2    | -                | 24.1/4.3        | 569/272  |
| Liu et al. (1) <sup>27</sup>        | 75/37      | -             | 81.4/39.3   | -                | -               | -        |
| Liu et al. (2) <sup>28</sup>        | 38.9/10.6  | -             | -           | -                | -               | -        |
| Liu et al. (3) <sup>29</sup>        | -          | -             | -           | -                | -               | -        |
| Lu et al. <sup>30</sup>             | 53.5/8.6   | -             | -           | -                | -               | -        |
| Lv et al. <sup>31</sup>             | 65.2/33.2  | -             | 85.3/17.4   | -                | -               | -        |
| Ma et al. <sup>32</sup>             | 25.4/6.1   | -             | 13.9/2.8    | -                | 16/17           | 529/386  |
| Masetti et al. <sup>33</sup>        | 123/80     | -             | -           | 1332/577         | -               | -        |
| Mao et al. <sup>34</sup>            | 37.1/9.4   | -             | -           | -                | -               | 302/215  |
| Middeldorp et al. <sup>35</sup>     | -          | -             | -           | -                | -               | -        |
| Ortiz-Brizuela et al. <sup>36</sup> | 13.7/6.5   | -             | -           | 647/335          | 10.6/4          | 488/367  |
| Pan et al. <sup>37</sup>            | 85.9/53.6  | -             | -           | -                | 24.1/9.9        | 519/393  |

|                                   |            |          |           |           |          |         |
|-----------------------------------|------------|----------|-----------|-----------|----------|---------|
| Qian et al. <sup>38</sup>         | 30.6/6     | -        | -         | -         | -        | -       |
| Qin et al. <sup>39</sup>          | 57.9/33.2  | -        | 25.2/13.3 | 800/524   | -        | -       |
| Rastad et al. <sup>40</sup>       | 45/16      | -        | -         | -         | -        | 578/442 |
| Ruan et al. <sup>41</sup>         | 126.6/34.1 | -        | 11.4/6.8  | 1298/614  | -        | 906/298 |
| Salacup et al. <sup>42</sup>      | 18.6/10    | -        | -         | 1357/660  | -        | 510/360 |
| Satici et al. <sup>43</sup>       | 147/28.8   | -        | -         | 3905/1501 | 13/3.8   | -       |
| Shahriarirad et al. <sup>44</sup> | 44/33.3    | -        | -         | -         | -        | -       |
| Shi et al. <sup>45</sup>          | 111/30     | -        | -         | -         | 235/6    | -       |
| Sun et al. <sup>46</sup>          | 31/5.1     | -        | 34.1/5.3  | -         | -        | 377/232 |
| Tang et al. (1) <sup>47</sup>     | -          | -        | -         | -         | -        | -       |
| Tang et al. (2) <sup>48</sup>     | -          | -        | -         | -         | -        | -       |
| Tian et al. <sup>49</sup>         | 49.4/42.5  | -        | 16.1/3.7  | 850/498   | 9.6/1.9  | 340/209 |
| Vultaggio et al. <sup>50</sup>    | 127/67.7   | -        | 53.6/15.7 | -         | -        | -       |
| Wan et al. <sup>51</sup>          | 91/7.7     | 139.4/22 | -         | -         | -        | -       |
| Wang et al. (1) <sup>52</sup>     | -          | -        | -         | -         | 11/5.1   | 435/212 |
| Wang et al. (2) <sup>53</sup>     | -          | -        | -         | -         | -        | 456/227 |
| Wang et al. (3) <sup>54</sup>     | -          | -        | -         | -         | 9.2/5.8  | 364/279 |
| Wang et al. (4) <sup>55</sup>     | 43.8/12.1  | -        | -         | -         | -        | -       |
| Wang et al. (5) <sup>56</sup>     | 134.6/12.9 | -        | 124.5/13  | 1612/555  | 57.6/4.8 | 498/256 |
| Wang et al. (6) <sup>57</sup>     | 114.9/53.6 | -        | -         | 1368/1331 | -        | -       |
| Wu et al. (1) <sup>58</sup>       | -          | 83/23.4  | 7.4/6.3   | 1029/458  | -        | 396/257 |
| Yan et al. <sup>59</sup>          | -          | 97.2/13  | 55.8/22.2 | -         | 43.1/1.9 | 501/237 |
| Yang et al. (1) <sup>60</sup>     | -          | -        | -         | -         | -        | -       |
| Yang et al. (2) <sup>61</sup>     | 88.4/27.1  | -        | -         | -         | -        | 398/251 |
| Yang et al. (3) <sup>62</sup>     | -          | -        | 54.1/6.9  | -         | -        | -       |
| Yang et al. (4) <sup>63</sup>     | 61/15.2    | -        | -         | -         | -        | -       |
| Ye et al. <sup>64β</sup>          | 65.5/12.3  | -        | -         | -         | 30/10    | -       |
| Zeng et al. <sup>65</sup>         | 44.1/5.5   | -        | -         | -         | -        | 280/173 |
| Zhang et al. (1) <sup>66</sup>    | 47.6/28.7  | -        | -         | -         | -        | -       |
| Zhang et al. (2) <sup>67</sup>    | 71.2/11.4  | -        | 33/1.1    | -         | -        | 371/225 |
| Zhang et al. (3) <sup>68</sup>    | 79.5/7.9   | -        | 35.7/5.1  | -         | -        | -       |
| Zhang et al. (4) <sup>69</sup>    | -          | -        | -         | -         | -        | -       |
| Zhang et al. (5) <sup>70</sup>    | 51.8/8.7   | -        | 51.9/4.1  | -         | 16.5/2.7 | 281/176 |
| Zheng et al. <sup>71</sup>        | 52.2/15.4  | -        | -         | -         | -        | -       |
| Zhou et al. (1) <sup>72</sup>     | -          | -        | 11/6.3    | 1435/503  | 22.2/3   | 521/254 |
| Zhou et al. (2) <sup>73</sup>     | 4.8/1.8    | -        | -         | -         | -        | 157/180 |
| Zhu et al. (1) <sup>74</sup>      | 36.6/8.5   | -        | 24.1/3.8  | -         | -        | -       |
| Zhu et al. (2) <sup>75</sup>      | -          | -        | -         | -         | -        | 786/352 |

5. **Table 4.** Clinical outcomes in included studies (percentage comparisons between severe and non-severe groups)

| <b>Study name</b>                   | <b>All-cause mortality (%)</b> | <b>Stroke/TIA (%)</b> | <b>Acute cardiac injury (%)</b> | <b>ARDS (%)</b> |
|-------------------------------------|--------------------------------|-----------------------|---------------------------------|-----------------|
| Bazzan et al. <sup>1</sup>          | 100/0                          | -                     | -                               | -               |
| Bonetti et al. <sup>2</sup>         | 100/0                          | -                     | -                               | -               |
| Burian et al. <sup>3</sup>          | -                              | -                     | -                               | -               |
| Cen et al. <sup>4</sup>             | -                              | -                     | -                               | -               |
| Chen et al. (1) <sup>5</sup>        | 41.7/0.8                       | -                     | -                               | -               |
| Chen et al. (2) <sup>6</sup>        | 36.4/0                         | -                     | 9.1/10                          | 54.5/0          |
| Chen et al. (3) <sup>7</sup>        | -                              | -                     | -                               | -               |
| Deng et al. <sup>8</sup>            | 100/0                          | -                     | 59.6/0.9                        | 89.9/8.6        |
| Du et al. <sup>9</sup>              | 100/0                          | -                     | -                               | -               |
| Duan et al. <sup>10</sup>           | -                              | -                     | -                               | -               |
| Fan et al. <sup>11</sup>            | 100/0                          | -                     | -                               | -               |
| Fogarty et al. <sup>12</sup>        | 39.4/0                         | -                     | -                               | -               |
| Fu et al. <sup>13</sup>             | -                              | -                     | -                               | -               |
| Gan et al. <sup>14</sup>            | 100/0                          | -                     | -                               | -               |
| Gao et al. <sup>15</sup>            | -                              | -                     | -                               | -               |
| Gong et al. <sup>16</sup>           | -                              | -                     | -                               | -               |
| Goshua et al. <sup>17</sup>         | -                              | -                     | -                               | -               |
| Huang et al. <sup>18</sup>          | 38.5/3.6                       | -                     | 30.8/3.6                        | 84.6/3.6        |
| Javarian et al. <sup>19</sup>       | 100/0                          | -                     | -                               | -               |
| Ji et al. <sup>20</sup>             | -                              | -                     | -                               | -               |
| Khamis et al. <sup>21</sup>         | -                              | -                     | -                               | -               |
| Li et al. (1) <sup>22</sup>         | -                              | -                     | -                               | -               |
| Li et al. (2) <sup>23</sup>         | -                              | -                     | -                               | -               |
| Li et al. (3) <sup>24</sup>         | 100/0                          | -                     | -                               | -               |
| Li et al. (4) <sup>25</sup>         | 100/0                          | -                     | 54.9/4.4                        | 87.7/2.8        |
| Li et al. (5) <sup>26</sup>         | 100/0                          | -                     | -                               | -               |
| Liu et al. (1) <sup>27</sup>        | -                              | -                     | -                               | -               |
| Liu et al. (2) <sup>28</sup>        | -                              | -                     | -                               | -               |
| Liu et al. (3) <sup>29</sup>        | 100/0                          | -                     | -                               | -               |
| Lu et al. <sup>30</sup>             | -                              | -                     | -                               | -               |
| Lv et al. <sup>31</sup>             | 8.3/0                          | -                     | -                               | -               |
| Ma et al. <sup>32</sup>             | -                              | -                     | 75/32.8                         | -               |
| Masetti et al. <sup>33</sup>        | 100/0                          | -                     | -                               | -               |
| Mao et al. <sup>34</sup>            | -                              | 5/1                   | -                               | -               |
| Middeldorp et al. <sup>35</sup>     | -                              | -                     | -                               | -               |
| Ortiz-Brizuela et al. <sup>36</sup> | -                              | -                     | -                               | -               |
| Pan et al. <sup>37</sup>            | 100/0                          | -                     | -                               | -               |
| Qian et al. <sup>38</sup>           | -                              | -                     | -                               | -               |
| Qin et al. <sup>39</sup>            | -                              | -                     | -                               | -               |

|                                   |          |   |          |           |
|-----------------------------------|----------|---|----------|-----------|
| Rastad et al. <sup>40</sup>       | 100/0    | - | -        | -         |
| Ruan et al. <sup>41</sup>         | 100/0    | - | -        | -         |
| Salacup et al. <sup>42</sup>      | 100/0    | - | -        | 73.1/8.4  |
| Satici et al. <sup>43</sup>       | 100/0    | - | -        | -         |
| Shahriarirad et al. <sup>44</sup> | 45.5/3.9 | - | -        | -         |
| Shi et al. <sup>45</sup>          | 100/0    | - | -        | -         |
| Sun et al. <sup>46</sup>          | -        | - | -        | -         |
| Tang et al. (1) <sup>47</sup>     | 100/0    | - | -        | -         |
| Tang et al. (2) <sup>48</sup>     | 100/0    | - | -        | -         |
| Tian et al. <sup>49</sup>         | -        | - | -        | -         |
| Vultaggio et al. <sup>50</sup>    | -        | - | -        | -         |
| Wan et al. <sup>51</sup>          | 2.5/0    | - | 5/8.4    | 50/1.1    |
| Wang et al. (1) <sup>52</sup>     | 16.7/0   | - | 22.2/2   | 61.1/4.9  |
| Wang et al. (2) <sup>53</sup>     | 100/0    | - | 42.1/4.5 | 89.5/12.5 |
| Wang et al. (3) <sup>54</sup>     | -        | - | -        | -         |
| Wang et al. (4) <sup>55</sup>     | -        | - | -        | -         |
| Wang et al. (5) <sup>56</sup>     | 14.3/0   | - | -        | -         |
| Wang et al. (6) <sup>57</sup>     | -        | - | -        | -         |
| Wu et al. (1) <sup>58</sup>       | 52.4/0   | - | -        | 100/0     |
| Yan et al. <sup>59</sup>          | 100/0    | - | -        | -         |
| Yang et al. (1) <sup>60</sup>     | 100/0    | - | -        | -         |
| Yang et al. (2) <sup>61</sup>     | 54.5/4.9 | - | 24.2/2.9 | 51.5/4.9  |
| Yang et al. (3) <sup>62</sup>     | -        | - | -        | -         |
| Yang et al. (4) <sup>63</sup>     | 100/0    | - | -        | -         |
| Ye et al. <sup>64</sup> $\beta$   | 100/0    | - | -        | 46.2/3.7  |
| Zeng et al. <sup>65</sup>         | -        | - | -        | -         |
| Zhang et al. (1) <sup>66</sup>    | -        | - | -        | -         |
| Zhang et al. (2) <sup>67</sup>    | -        | - | -        | -         |
| Zhang et al. (3) <sup>68</sup>    | -        | - | -        | -         |
| Zhang et al. (4) <sup>69</sup>    | 100/0    | - | -        | -         |
| Zhang et al. (5) <sup>70</sup>    | -        | - | -        | -         |
| Zheng et al. <sup>71</sup>        | -        | - | -        | -         |
| Zhou et al. (1) <sup>72</sup>     | 100/0    | - | 59.3/0.7 | 92.6/6.6  |
| Zhou et al. (2) <sup>73</sup>     | -        | - | -        | -         |
| Zhu et al. (1) <sup>74</sup>      | -        | - | -        | -         |
| Zhu et al. (2) <sup>75</sup>      | 100/0    | - | -        | -         |

6. **Table 5.** Meta-analyses comparing Chinese to non-Chinese studies (data presented as severe / non-survivor vs. non-severe / survivor)

|                                       | Chinese studies (n=60; 11,673 patients) |                                                | Non-Chinese studies (n=15; 5,379 patients) |                                                | European/USA studies (n=9; 1,325 patients) |                                              |
|---------------------------------------|-----------------------------------------|------------------------------------------------|--------------------------------------------|------------------------------------------------|--------------------------------------------|----------------------------------------------|
|                                       | Percentage or Mean± St dev              | WMD ± St Error                                 | Percentage or Mean± St dev                 | WMD ± St Error                                 | Percentage or Mean± St dev                 | WMD ± St Error                               |
| Age                                   | 63.9±7.3 vs. 51.2±9.5 (n=10,678)        | 11.38±1, I <sup>2</sup> =88.87%, p<0.001       | 66.7±7.9 vs. 57.6±5.1 (n=5,266)            | 8.49±1.22, I <sup>2</sup> =42.88%, p<0.001     | 69.9±5.5 vs. 60.5±2.1 (n=1,325)            | 8.30±1.60, I <sup>2</sup> =53.81%, p<0.001   |
| Men                                   | 64.2% vs. 52%                           | -                                              | 63.9% vs. 68.2%                            | -                                              | 61.9% vs. 75%                              | -                                            |
| Hypertension                          | 42.6% vs. 19.6%                         | -                                              | 50.7% vs. 47.3%                            | -                                              | 58.3% vs. 71.7%                            | -                                            |
| Diabetes                              | 25.9% vs. 14.4%                         | -                                              | 35.2% vs. 27.4%                            | -                                              | 32.5% vs. 35.8%                            | -                                            |
| Cardiac or cerebrovascular disease    | 22% vs. 6.4%                            | -                                              | 29.5% vs. 14.5%                            | -                                              | 40.8% vs. 25.4%                            | -                                            |
| Chronic kidney disease                | 5.9% vs. 2%                             | -                                              | 11.9% vs. 10.2%                            | -                                              | 12.4% vs. 12.7%                            | -                                            |
| Malignancy                            | 9.8% vs. 7.8%                           | -                                              | 9.5% vs. 6.3%                              | -                                              | 10.2% vs. 8.9%                             | -                                            |
| Chronic liver disease                 | 4.9% vs. 3.8%                           | -                                              | 5.9% vs. 1.8%                              | -                                              | 3.8% vs. 3.2                               | -                                            |
| Chronic Obstructive Pulmonary Disease | 7.4% vs. 1.9%                           | -                                              | 13.2% vs. 7.7%                             | -                                              | 14.4% vs. 8.9%                             | -                                            |
| Platelet count                        | 163±29 vs. 193±30 (n=7,814)             | -16.74±2.56, I <sup>2</sup> =77.05%, p<0.001   | 202±36 vs. 211±25 (n=1,839)                | 2.31±6.54, I <sup>2</sup> =72.56%, p=0.72      | 185±43 vs. 221±31 (n=742)                  | -16.68±12.47, I <sup>2</sup> =77.09%, p=0.18 |
| D-dimer levels (mg/dL)                | 2.9±3.4 vs. 0.7±0.7 (n=9,371)           | 0.53±0.06, I <sup>2</sup> =84.18%, p<0.001     | 3±1.8 vs. 1.3±1.1 (n=2,001)                | 1.30±0.28, I <sup>2</sup> =81.50%, p<0.001     | 2.7±1.2 vs. 1.1±0.4 (n=973)                | 1.21±0.36, I <sup>2</sup> =58.70%, p<0.001   |
| Prothrombin time (s)                  | 13.8±2 vs. 12.7±1.2 (n=6,288)           | 0.77±0.08, I <sup>2</sup> =35.06%, p<0.001     | 14.6±2.4 vs. 13.9±1.9                      | Not enough data                                | Not enough data                            | Not enough data                              |
| aPTT (s)                              | 37±9.1 vs. 35.3±5.2 (n=5,016)           | 0.79±0.42, I <sup>2</sup> =72.63%, p=0.06      | 34.1±3.7 vs. 33.3±3.7 (n=340)              | 0.96±1.43, I <sup>2</sup> =56.88%, p=0.15      | 32.2±2.5 vs. 31.2±0.2                      | Not enough data                              |
| Fibrinogen levels (g/L)               | 4.2±1 vs. 3.8±1.1 (n=3,487)             | 0.38±0.14, I <sup>2</sup> =62.97%, p=0.01      | 5.5±1.2 vs. 4.6±0.8 (n=1,133)              | 0.67±0.35, I <sup>2</sup> =44.04%, p=0.06      | 5.5±0.2 vs. 5±0.7                          | Not enough data                              |
| C-reactive protein (CRP) (mg/L)       | 67±32.3 vs. 19.5±15.6 (n=9,061)         | 39.20±3.81, I <sup>2</sup> =84.78%, p<0.001    | 85.9±57 vs. 35.8±24.6 (n=5,025)            | 26.91±4.67, I <sup>2</sup> =85.42%, p<0.001    | 90.2±62.2 vs. 43.5±31.1 (n=971)            | 30.22±7.13, I <sup>2</sup> =88.83%, p<0.001  |
| hs-CRP (mg/L)                         | 96.6±24.9 vs. 22.9±6.5 (n=636)          | 62.68±8.88, I <sup>2</sup> =0%, p<0.001        | Not enough data                            | Not enough data                                | Not enough data                            | Not enough data                              |
| Interleukin-6 (pg/L)                  | 46.7±35.3 vs. 10.6±9.5 (n=4,070)        | 20.53±2.44, I <sup>2</sup> =89.35%, p<0.001    | 78.8±35.6 vs. 33.7±25.5                    | Not enough data                                | 78.8±33.7 vs. 33.7±25.5                    | Not enough data                              |
| Ferritin (ng/mL)                      | 1238±336 vs. 576±275 (n=2,834)          | 508.18±109.27, I <sup>2</sup> =60.49%, p<0.001 | 1582±1171 vs. 734±397 (n=1,499)            | 516.68±115.87, I <sup>2</sup> =42.36%, p<0.001 | 1325±37 vs. 646±63 (n=615)                 | 679.94±132.56, I <sup>2</sup> =0%, p<0.001   |



|                       |                               |                                                         |                               |                                                     |                  |                 |
|-----------------------|-------------------------------|---------------------------------------------------------|-------------------------------|-----------------------------------------------------|------------------|-----------------|
| hs-Troponin I (pg/mL) | 38.9±57.3 vs. 5.8±4 (n=2,410) | 10.51±2.05, I <sup>2</sup> =90.03%, <b>p&lt;0.001</b>   | 23.7±20.6 vs. 5.3±2.4 (n=965) | 12.35±5.29, I <sup>2</sup> =74.21%, p=0.02          | Not enough data  | Not enough data |
| LDH (U/L)             | 437±157 vs. 254±60 (n=5,609)  | 152.64±23.24, I <sup>2</sup> =88.89%, <b>p&lt;0.001</b> | 508±49 vs. 336±69 (n=3,546)   | 162.24±21.68, I <sup>2</sup> =0%, <b>p&lt;0.001</b> | 516±8 vs. 338±31 | Not enough data |
